# Supplementary material for: High-Resolution Analysis of Parent-of-Origin Allelic Expression in the Arabidopsis Endosperm
Source: PubMed Central journal article supplement (PMC3116908; doi:10.1371/journal.pgen.1002126), 2011-06-16

Figure S2

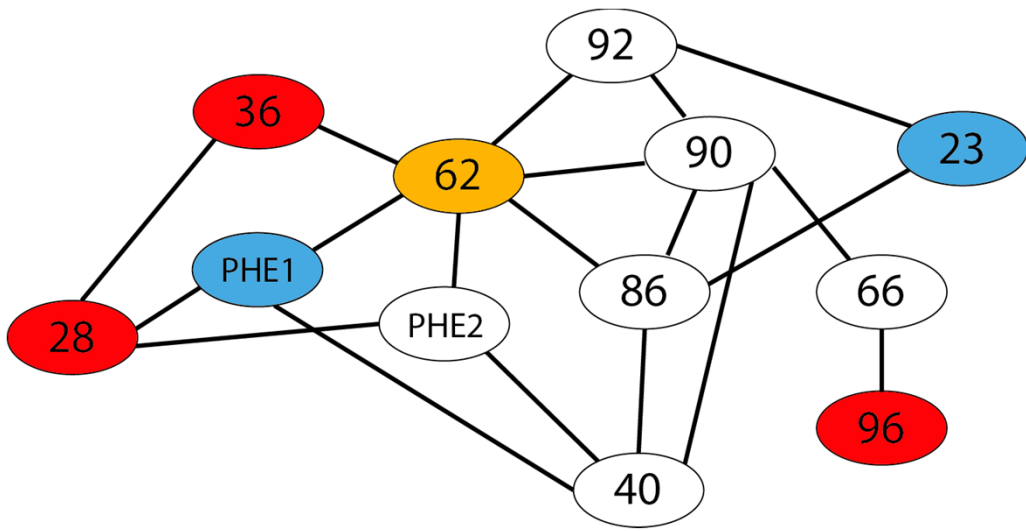

Supplement: pgen.1002126.s002.pdf [file pgen.1002126.s002.pdf]
