# Supplementary material for: High-Resolution Analysis of Parent-of-Origin Allelic Expression in the Arabidopsis Endosperm
Source: PubMed Central journal article supplement (PMC3116908; doi:10.1371/journal.pgen.1002126), 2011-06-16

**Figure S8**

**A**

739 unfiltered MEGs\_LC (651 have SNPs in Col-0/Bur-0 accessions)      12041 unfiltered MEGs\_BC (10608 have SNPs in Ler/Col accessions)

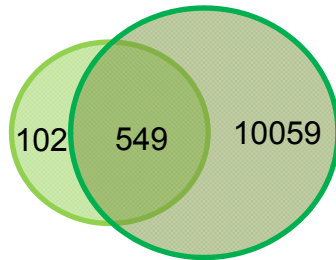

739 unfiltered MEGs\_LC (651 have SNPs in Col-0/Bur-0 accessions)      39 filtered MEGs\_BC (36 have SNPs in Ler/Col accessions)

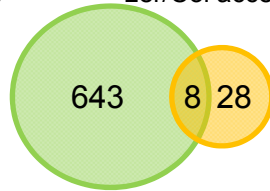

114 filtered MEGs\_LC (101 have SNPs in Col-0/Bur-0 accessions)      12041 unfiltered MEGs\_BC (10608 have SNPs in Ler/Col accessions)

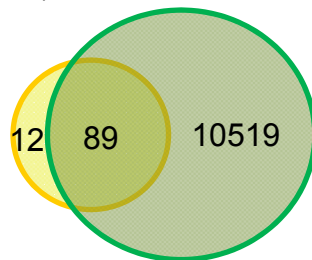

114 filtered MEGs\_LC (101 have SNPs in Col-0/Bur-0 accessions)      39 filtered MEGs\_BC (36 have SNPs in Ler/Col accessions)

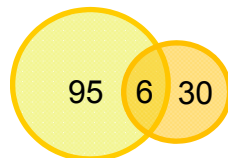

**B**

25 unfiltered PEGs\_LC (22 have SNPs in Col-0/Bur-0 accessions)      119 unfiltered PEGs\_BC (106 have SNPs in Ler/Col accessions)

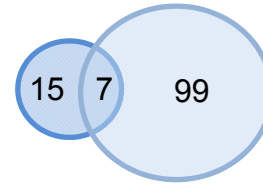

25 unfiltered PEGs\_LC (22 have SNPs in Col-0/Bur-0 accessions)      27 filtered PEGs\_BC (24 have SNPs in Ler/Col accessions)

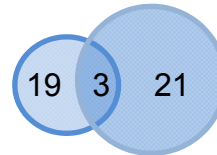

Supplement: pgen.1002126.s008.pdf [file pgen.1002126.s008.pdf]
