# Supplementary material for: High-Resolution Analysis of Parent-of-Origin Allelic Expression in the Arabidopsis Endosperm
Source: PubMed Central journal article supplement (PMC3116908; doi:10.1371/journal.pgen.1002126), 2011-06-16
Supplement: pgen.1002126.s017.pdf [file pgen.1002126.s017.pdf]

**Table S8. GO analysis of MEGs and PEGs (including accession-dependent MEGs and PEGs).**

**MEGs**

**Biological Process**

| <b>GO term</b> | <b>p-value</b> | <b>Number</b> | <b>Definition</b>                          |
|----------------|----------------|---------------|--------------------------------------------|
| GO:0009056     | 0.0012         | 7             | Catabolic process                          |
| GO:0006355     | 0.0022         | 6             | Regulation of transcription, DNA-dependent |
| GO:0032774     | 0.0027         | 6             | RNA biosynthetic process                   |

**Molecular Functions**

|            |          |   |                               |
|------------|----------|---|-------------------------------|
| GO:0004126 | 2,87E+07 | 3 | Cytidine deaminase activity   |
| GO:0003700 | 0.043    | 6 | Transcription factor activity |

**PEGs**

**Biological Process**

|            |       |   |                       |
|------------|-------|---|-----------------------|
| GO:0006996 | 0.012 | 3 | Nucleus organization  |
| GO:0032502 | 0.020 | 5 | Developmental process |
