# Supplementary material for: High-Resolution Analysis of Parent-of-Origin Allelic Expression in the Arabidopsis Endosperm
Source: PubMed Central journal article supplement (PMC3116908; doi:10.1371/journal.pgen.1002126), 2011-06-16
Supplement: pgen.1002126.s018.pdf [file pgen.1002126.s018.pdf]

**Table S9. Median omega, *dN* and *dS* values as calculated from pairwise alignments between *Arabidopsis thaliana* and *Arabidopsis lyrata* orthologs. Measure of spread represented as the semi interquartile range.**

|                  | <b>Nr. of genes tested</b> | <b><i>dN/dS</i></b> | <b><i>dN</i></b> | <b><i>dS</i></b> |
|------------------|----------------------------|---------------------|------------------|------------------|
| MEGs             | 27                         | 0.717 ± 0.354       | 0.106 ± 0.044    | 0.152 ± 0.028    |
| PEGs             | 19                         | 0.481 ± 0.255       | 0.109 ± 0.047    | 0.192 ± 0.045    |
| Background genes | 19,965                     | 0.181 ± 0.101       | 0.026 ± 0.015    | 0.146 ± 0.032    |
