# Supplementary material for: High-Resolution Analysis of Parent-of-Origin Allelic Expression in the Arabidopsis Endosperm
Source: PubMed Central journal article supplement (PMC3116908; doi:10.1371/journal.pgen.1002126), 2011-06-16
Supplement: pgen.1002126.s021.pdf [file pgen.1002126.s021.pdf]

**Table S12. Number of homologous genes to MEGs and PEGs (including accession-dependent MEGs and PEGs) in comparison to the genome-wide frequency of gene homologs.**

|        | <b>Number of homologs</b> | <b>Number of genes</b> | <b>Percentage</b> | <b>p value</b> |
|--------|---------------------------|------------------------|-------------------|----------------|
| Genome | 0                         | 6251                   | 23.17             |                |
|        | >0                        | 20726                  | 76.83             |                |
| MEGs   | 0                         | 4                      | 10.26             | 0.023          |
|        | >0                        | 35                     | 89.74             |                |
| PEGs   | 0                         | 2                      | 7.41              | 0.026          |
|        | >0                        | 25                     | 92.59             |                |

P values were determined using hypergeometric testing.
