# Supplementary material for: High-Resolution Analysis of Parent-of-Origin Allelic Expression in the Arabidopsis Endosperm
Source: PubMed Central journal article supplement (PMC3116908; doi:10.1371/journal.pgen.1002126), 2011-06-16
Supplement: pgen.1002126.s029.pdf [file pgen.1002126.s029.pdf]

Table S20. Primers and enzymes used for allele-specific expression analysis.

| <b>Locus</b> | <b>Primer (5'-3')</b>                                      | <b>Enzyme</b>                |
|--------------|------------------------------------------------------------|------------------------------|
| AT1G51000    | ATGGCTAATATTGTTGGAAACACT,<br>CTTCTCCTTCACAGTTTCTTT         | Ban I<br>(1 site in Bur-0)   |
| AT3G21830    | CTGCTTCTTCCTCAGGTGTT,<br>TGATCTCGAGAAGTGGGACA              | Hinf I<br>(1 site in Bur-0)  |
| AGL36        | AGTCATTTTCCGACTCTCCTATTCATG,<br>GGTAGTTGATTGGATGGTAGTTGATG | TspR I<br>(1 site in Bur-0)  |
| AGL96        | GTGAACTTGCTGATCTCTCCCC,<br>GCTCTCTCCTTTATAGGTCCCCAA        | Hph I<br>(1 site in Bur-0)   |
| AGL28        | GGTAAAAATGACCAACGAATCAAAC,<br>TGGACTATTGACTGCTTGGTCTCTT    | Bsr I<br>(1 site in Bur-0)   |
| AT1G35183    | ATGGAAAGTAACAACCTTCATTCGTG,<br>TCAGAACCTGTCTCCATATCATCG    | Nla III<br>(1 site in Col-0) |
| AT1G49290    | AGGGAGAAACAATTGGCTTTAGA,<br>CTATCACTTCCCCGAATCTCCTA        | Fok I<br>(1 site in Col-0)   |
| AT4G31900    | GAAAACCAATGTAATCCTTGCG,<br>GAAAATGCATCAGAGCGAAAAG          | detection by<br>sequencing   |
| AGL23        | TACACAAAGCTTCATGTTCAAATGC,<br>ACCCCTGGTTTGTGGAGATATTA      | Apa I<br>(1 site in Bur-0)   |

|           |                                                        |                                                 |
|-----------|--------------------------------------------------------|-------------------------------------------------|
| AT5G54350 | AGCCTCCTGTTGCTCCTCCT,<br>AACCACCTTATCCTCCCGATAG        | Tsp45 I<br>(1 site in Col-0)                    |
| At3G50720 | GTTACCGAACTCGTAAGAGGTGG,<br>CCAATTCGGAGTGGCTCA         | Ava I<br>(1 site in Bur-0;<br>2 sites in Col-0) |
| At1g52460 | AATGGATATGTCCATCTCTCGTGCT,<br>CGTTTTAGGCTCTTCGCCTT     | detection by<br>sequencing                      |
| At3g23060 | TGAAGACAATGGATTGGACGAA,<br>TCTTTTCCACCGTTTTCTTACC      | detection by<br>sequencing                      |
| At5g03020 | ATACATAATCGGTGGATTGTTAGG,<br>GCATGCCTTGGTCGTAAAGTAAT   | detection by<br>sequencing                      |
| At1g60970 | AACAAATGCTAGGACCGAAGTGG,<br>TTAGGGTCAGTGCTATTGATCCC    | detection by<br>sequencing                      |
| At2g19400 | GCCAGTGGTCAATGGAGAACTT,<br>AATTGCAGAGTCACTTCGGGTAG     | detection by<br>sequencing                      |
| At4g29570 | TCTCCGGATCACCTGTCGTAG,<br>ATGTTCCCTTTCTGACCGGTTG       | detection by<br>sequencing                      |
| At5g46300 | TTGGAGAAAAAGAGATTGACGATC,<br>GACTCCTTTTCTCCAATGAACACTT | detection by<br>sequencing                      |
| At3g10590 | CCAACGATGTTAATCAGATGCC,<br>GCCCTCGGTAGACTCCAAAGTT      | detection by<br>sequencing                      |
| At1g20730 | CTCACCAGGCAGATCGCAA,<br>ACCGCAGTGAGAGCAGAGATTA         | detection by<br>sequencing                      |

---

|           |                                                       |                            |
|-----------|-------------------------------------------------------|----------------------------|
| At1g60400 | ATCAGAAATTTTCTCACCGGGA,<br>TGAAACTGGTGTCTTCTGCTGAAC   | detection by<br>sequencing |
| At5g50470 | GCGACGTTGTCCCAAGAGA,<br>TCCAATTTCCCCAGCTGC            | detection by<br>sequencing |
| At3g62230 | TAACGACCGGTTAATGAAGTTGG,<br>GCATGAATCTGATTCCAACAACTC  | detection by<br>sequencing |
| At3g49770 | AGGATTCTCCCTACAACCTTCTACA,<br>GATTATATGCATCATCCTCGTCG | detection by<br>sequencing |
| At1g66630 | AACTGTTGGAGCTTGATCTTCTG,<br>TGGTTCAGGGCAGTAGCAAAG     | detection by<br>sequencing |
| At1g11810 | GCAAAAACCGTAACCACAAAATC,<br>TCATCACCCAAAGACTCAAACG    | detection by<br>sequencing |
| At4g11940 | AAAGTTCTTCTTTGCTTGGTCGC,<br>TCATACCATCCAAACCGATTGT    | detection by<br>sequencing |

---
