# Supplementary material for: High-Resolution Analysis of Parent-of-Origin Allelic Expression in the Arabidopsis Endosperm
Source: PLoS Genet. 2011 Jun 16;7(6):e1002126. doi: 10.1371/journal.pgen.1002126 (PMC3116908; doi:10.1371/journal.pgen.1002126)
Supplement: Table S3 — Genes that are expressed in at least one stage and domain of endosperm development until heart stage and are not expressed in the seed coat and in vegetative tissues (seedlings, cotyledons, hypocotyl, leaves, stems, roots, shoot apical meristem, flowers at stages 10, 12). (XLSX) [file pgen.1002126.s012.xlsx]

## Sheet: Tabelle1
Table S3. Genes that are expressed in at least one stage and domain of endosperm development until heart stage and are not expressed in the seed coat and in vegetative tissues (seedlings, cotyledons, hypocotyl, leaves, stems, roots, shoot apical meristem, flowers at stages 10, 12).
Locus
AT2G23260
AT2G23250
AT2G23210
AT2G33130
AT4G25530
AT4G17505
AT4G16460
AT4G15040
AT1G56620
AT1G28327
AT1G28300
AT1G44130
AT1G35183
AT1G57780
AT5G09490
AT5G19700
AT5G10660
AT5G20430
AT4G36590
AT4G36700
AT5G17470
AT5G16770
AT5G14860
AT5G33340
AT5G27910
AT5G27610
AT5G27960
AT5G25950
AT5G26250
AT5G25410
AT5G66150
AT5G65370
AT5G63730
AT5G63740
AT5G62830
AT5G62110
AT5G62120
AT5G61470
AT5G60440
AT5G60220
AT5G59590
AT5G59100
AT5G59190
AT5G58810
AT5G58820
AT5G58830
AT5G58840
AT5G56200
AT5G56480
AT5G55590
AT5G55080
AT5G54220
AT5G53840
AT5G52480
AT5G52140
AT5G49420
AT5G46960
AT5G46820
AT5G46300
AT5G44830
AT5G42910
AT5G41450
AT5G40430
AT5G40680
AT5G40155
AT5G39440
AT5G39560
AT5G38960
AT5G39230
AT5G39260
AT5G39280
AT5G38160
AT5G38170
AT5G38180
AT5G38195
AT5G38330
AT5G37520
AT5G36770
AT5G35900
AT5G24440
AT5G24316
AT5G23650
AT5G19270
AT5G17730
AT5G14400
AT5G13600
AT5G12060
AT5G11220
AT5G10220
AT5G07880
AT5G07850
AT5G07210
AT5G07260
AT5G06500
AT5G06020
AT5G05260
AT5G05030
AT5G05220
AT5G03920
AT5G03810
AT5G03020
AT3G62350
AT3G60010
AT3G59610
AT3G57270
AT3G57250
AT3G56520
AT3G55940
AT3G55590
AT3G54570
AT3G51700
AT3G49300
AT3G48950
AT3G46840
AT3G46860
AT3G43990
AT3G42830
AT4G39753
AT4G39650
AT4G39000
AT4G37950
AT4G35725
AT4G34330
AT4G33840
AT4G34300
AT4G32080
AT4G32105
AT4G31900
AT4G30380
AT4G30070
AT4G30120
AT4G29570
AT4G29640
AT4G29650
AT4G29370
AT4G29285
AT4G27890
AT4G26140
AT4G24650
AT4G23350
AT4G23080
AT4G23090
AT4G22400
AT4G22430
AT4G22050
AT4G22030
AT4G21690
AT4G21080
AT4G20800
AT4G20200
AT4G18870
AT4G13380
AT4G13060
AT4G13080
AT4G12140
AT4G11510
AT4G11400
AT4G10210
AT4G05630
AT4G05250
AT4G02780
AT4G02300
AT4G10150
AT1G17800
AT1G22210
AT1G22110
AT1G34170
AT1G19160
AT1G20680
AT1G20690
AT1G20730
AT1G13680
AT1G16980
AT1G50990
AT1G51000
AT3G66656
AT3G12190
AT1G31530
AT3G13630
AT3G21410
AT3G20030
AT3G24280
AT3G24220
AT3G14480
AT3G26590
AT2G03290
AT1G61330
AT2G17750
AT2G16290
AT2G15325
AT2G24880
AT1G20940
AT1G49190
AT3G09140
AT3G01880
AT3G24790
AT3G25750
AT3G13370
AT3G23060
AT3G25280
AT3G28490
AT3G17140
AT3G16970
AT3G17080
AT3G25420
AT3G21830
AT3G21840
AT3G21860
AT3G19350
AT3G25990
AT3G14640
AT3G24510
AT3G27720
AT3G27785
AT3G15490
AT3G17230
AT3G04100
AT3G05860
AT3G11920
AT3G10780
AT3G10900
AT3G11740
AT3G03260
AT3G03240
AT3G03230
AT3G10590
AT3G03410
AT3G03400
AT3G05460
AT3G05310
AT1G69100
AT1G01530
AT1G28030
AT1G48010
AT1G77780
AT1G60980
AT1G60985
AT1G60970
AT1G29610
AT1G64290
AT1G49810
AT1G73560
AT1G72580
AT1G71250
AT1G78220
AT1G73610
AT1G36340
AT1G71890
AT1G72000
AT1G36000
AT1G80330
AT1G63960
AT1G69190
AT1G69860
AT1G11070
AT1G62340
AT1G19320
AT1G15040
AT1G21850
AT1G29080
AT1G29110
AT1G06020
AT1G12180
AT1G12190
AT1G34410
AT1G26795
AT1G52960
AT1G07690
AT1G47765
AT1G47810
AT1G76290
AT1G10680
AT1G66060
AT1G65990
AT1G59670
AT1G02980
AT1G52460
AT1G74990
AT1G77830
AT1G73000
AT1G73120
AT1G17000
AT1G64830
AT1G59800
AT1G65760
AT1G75600
AT1G13370
AT1G24000
AT1G23320
AT1G78500
AT1G30710
AT1G30740
AT2G40210
AT2G31780
AT2G31760
AT2G24950
AT2G04750
AT1G04380
AT2G20595
AT2G20620
AT2G35890
AT2G03770
AT2G03560
AT1G79370
AT1G79330
AT1G22670
AT1G65330
AT1G54640
AT1G78710
AT1G10190
AT1G10010
AT1G09510
AT1G09550
AT1G04645
AT1G65640
AT1G03445
AT1G61090
AT1G27220
AT1G30860
AT1G51290
AT1G51300
AT1G51320
AT1G51210
AT2G15740
AT2G06090
AT2G20170
AT2G20160
AT2G27320
AT2G14540
AT2G01810
AT2G25630
AT2G18490
AT2G19510
AT2G18720
AT2G45110
AT2G12190
AT2G27700
AT2G32370
AT2G32360
AT3G18340
AT2G23970
AT2G23990
AT2G03190
AT2G26880
AT2G26050
AT2G34555
AT2G37720
AT2G30900
AT2G30810
AT2G02515
AT2G30090
AT2G44550
AT2G44250
AT2G44560
AT2G26320
AT2G34890
AT2G34990
AT2G19150
AT2G30730
AT2G42090
AT2G39640
AT2G42100
AT5G20440
AT5G26650
AT5G38620
AT5G46950
AT5G46810
AT5G44840
AT5G39300
AT5G36680
AT5G12070
AT2G27070
AT5G03820
AT3G46850
AT4G33830
AT4G33930
AT4G23360
AT4G23370
AT4G12150
AT4G10160
AT2G03040
AT1G61320
AT2G16300
AT3G27710
AT3G30540
AT3G43350
AT1G66000
AT1G52440
AT1G75610
AT1G65300
AT4G15050
AT2G07120
AT2G44540
AT5G08360
AT1G55050
AT1G43330
AT4G00540
AT1G54280
AT2G18880
AT2G19400
