# Supplementary material for: High-Resolution Analysis of Parent-of-Origin Allelic Expression in the Arabidopsis Endosperm
Source: PLoS Genet. 2011 Jun 16;7(6):e1002126. doi: 10.1371/journal.pgen.1002126 (PMC3116908; doi:10.1371/journal.pgen.1002126)
Supplement: Table S17 — Comparative analysis of parent-of-origin specific genes identified in this study and published in [45]. Overlap of filtered MEGs_LC (p<0.001) and filtered MEGs_BC (Table S7). MEGs_LC, MEGs identified by Hsieh and colleagues [45] using Ler/Col-0 accessions; MEGs_BC, MEGs identified in this study using Bur-0/Col-0 accessions. Genes marked in yellow have been identified as accession-dependent MEGs_BC. (XLSX) [file pgen.1002126.s026.xlsx]

## Sheet: Tabelle1
Table S17. Comparative analysis of parent-of-origin specific genes identified in this study and published in Hsieh et al., 2011. Overlap of filtered MEGs_LC (p<0.001) and filtered MEGs_BC (Table S7).
MEGs_LC, MEGs identified by Hsieh et al., 2011 using Ler/Col-0 accessions; MEGs_BC, MEGs identified in this study using Bur/Col-0 accessions. Genes marked in yellow have been idenified as accession-dependent MEGs_BC.
Locus	Description
AT1G61090	similar to unknown protein [Arabidopsis thaliana] (TAIR:AT1G61095.1)
AT3G10590	myb family transcription factor
AT3G21830	ASK8 (ARABIDOPSIS SKP1-LIKE 8)
AT4G00540	MYB3R2
AT4G29570	cytidine deaminase, putative / cytidine aminohydrolase, putative
AT4G29640	cytidine deaminase, putative / cytidine aminohydrolase, putative
